# Supplementary material for: Plasmon-enhanced photoluminescence of Si-V centers in diamond from a nanoassembled metal–diamond hybrid structure
Source: Royal Society of Chemistry journal article supplement (doi:10.1039/c4ce01140f), 2014-07-14
Supplement: c4ce01140f1.pdf [file c4ce01140f1.pdf]

## Supplementary Information

### Plasmon-enhanced photoluminescence of Si-V center in diamond from a nanoassembled metal-diamond hybrid structure

Jie Song,<sup>a</sup> Hongdong Li,<sup>\*a</sup> Feng Lin,<sup>\*b</sup> Liying Wang,<sup>a</sup> Honglin Wu,<sup>c</sup> and Yanqiang Yang<sup>c</sup>

State Key Laboratory of Superhard Materials, Jilin University, Changchun 130012, PR China.

E-mail address: hdli@jlu.edu.cn.

**Fig. S1** The schematic diagram of fabricating samples A (right part, deposited with Au layer and subsequent etched by oxygen plasmon) and sample B (left part, no Au layer deposition and un-etching, shadowed with a freestanding CVD diamond film or a single crystal diamond plate cover) on the same Si-doped CVD homoepitaxial diamond layer grown on a HTHP diamond substrate, as mentioned in the text.

**Fig. S2** The XPS spectrum of Au nanoparticles in the diamond-pits.

**Fig. S3** Up, the typical three dimensional AFM image of the CVD Si-doped homoepitaxial diamond layer with diamond-pits after removing Au nanoparticles by soaking in *aqua regia*. Down, the corresponding cross-sectional profile for the feature as marked in the line of 3D AFM image.

**Fig. S4** The reflection spectrum of the hybrid structure of diamond-pits infilled with Au nanoparticles.

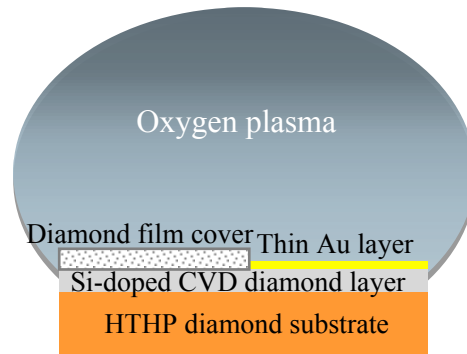

**Fig. S1** The schematic diagram of fabricating samples A (right part, deposited with Au layer and subsequent etched by oxygen plasmon) and sample B (left part, no Au layer deposition and un-etching, shadowed with a freestanding CVD diamond film or a single crystal diamond plate cover) on the same Si-doped CVD homoepitaxial diamond layer grown on a HTHP diamond substrate, as mentioned in the text.

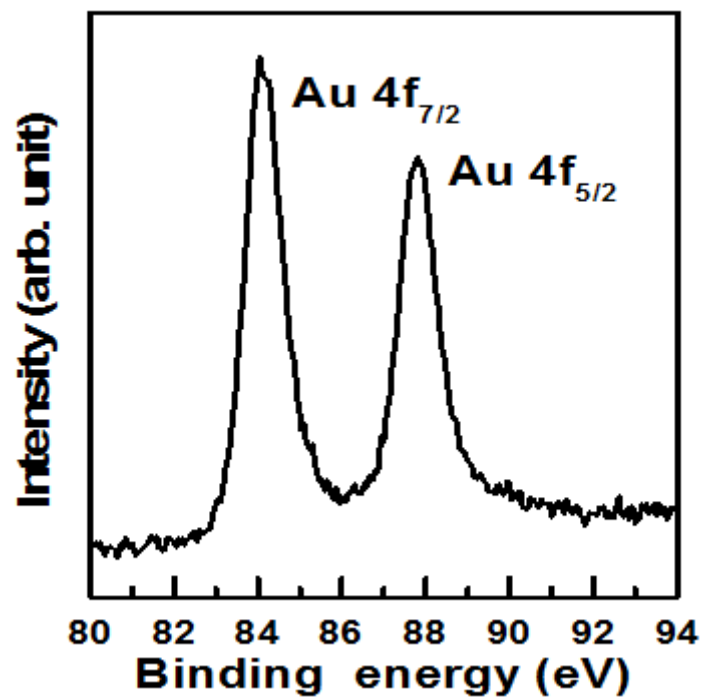

**Fig. S2** The XPS spectrum of Au nanoparticles in the diamond-pits.

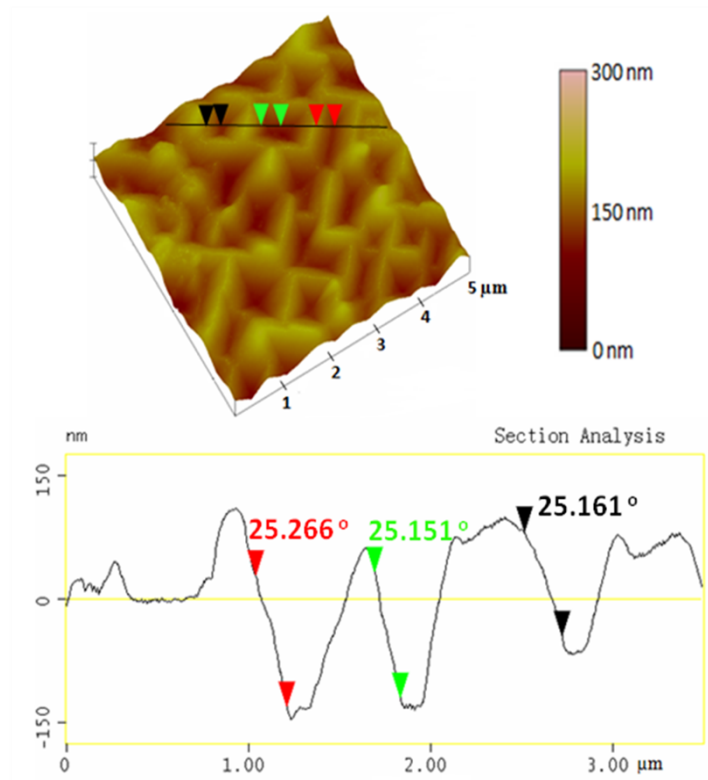

**Fig. S3** Up, the typical three dimensional AFM image of the CVD Si-doped homoepitaxial diamond layer with diamond-pits after removing Au nanoparticles by soaking in *aqua regia*. Down, the corresponding cross-sectional profile for the feature as marked in the line of 3D AFM image.

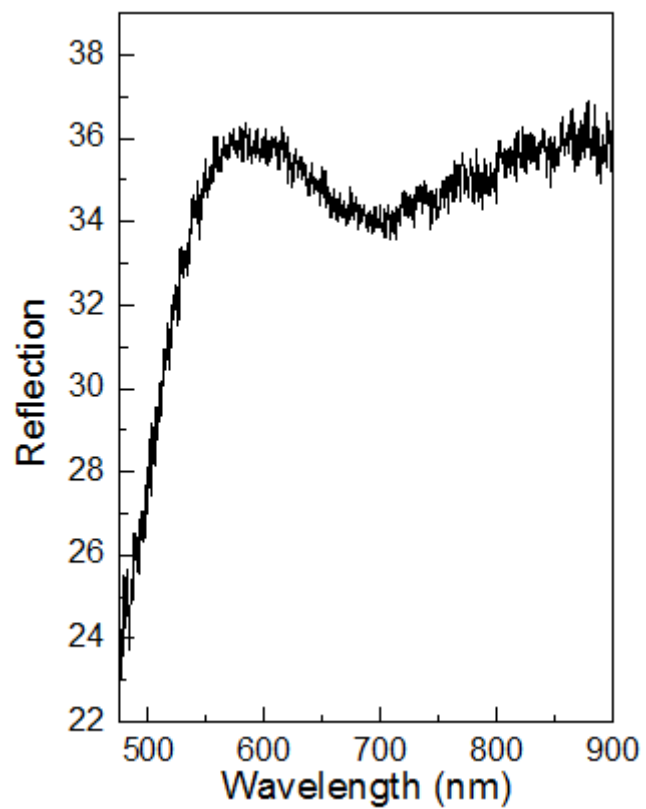

**Fig. S4** The reflection spectrum of the hybrid structure of diamond-pits infilled with Au nanoparticles.
